# Supplementary material for: Latitudinal-Related Variation in Wintering Population Trends of Greylag Geese (Anser Anser) along the Atlantic Flyway: A Response to Climate Change?
Source: PubMed Central journal article supplement (PMC4605798; doi:10.1371/journal.pone.0140181), 2015-10-14

**S1 Fig.** Surface of crops. Data from Eurostat

([http://epp.eurostat.ec.europa.eu/portal/page/portal/agriculture/agricultural\\_production/database](http://epp.eurostat.ec.europa.eu/portal/page/portal/agriculture/agricultural_production/database)).

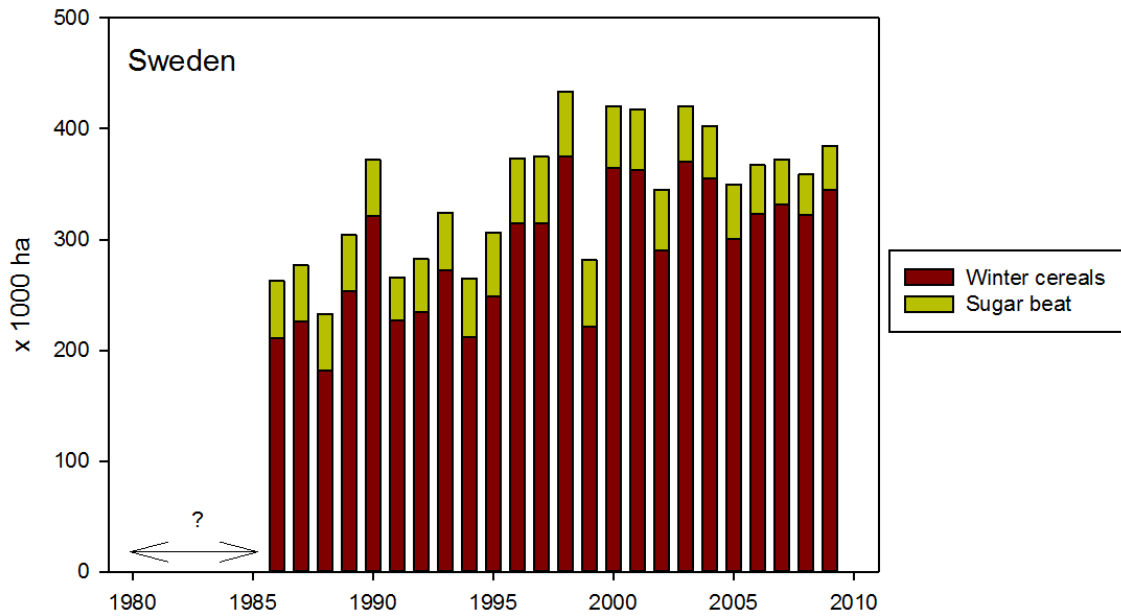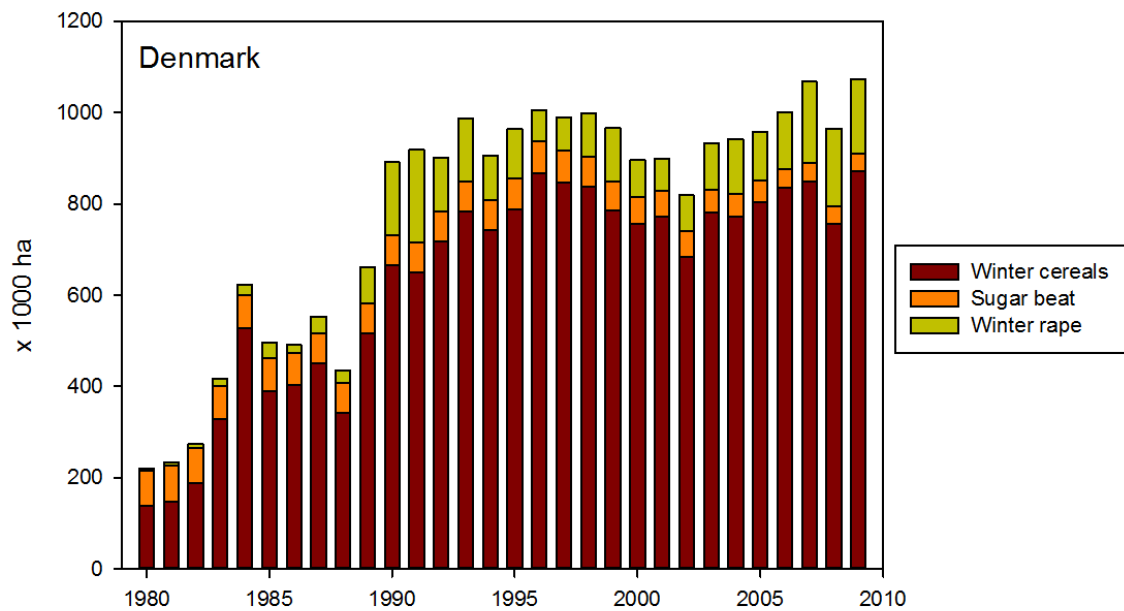

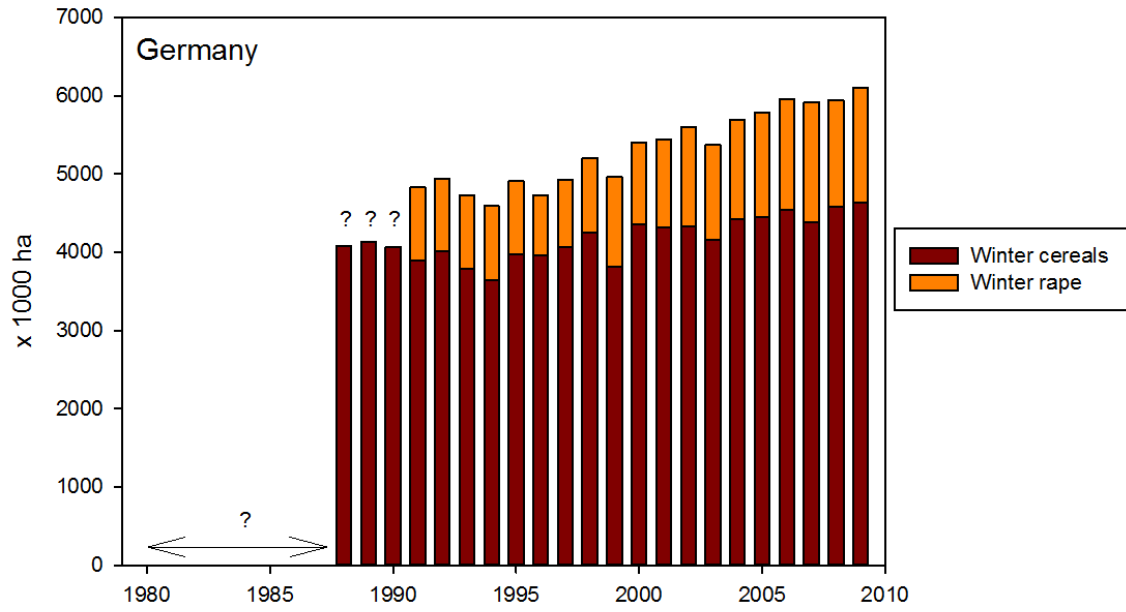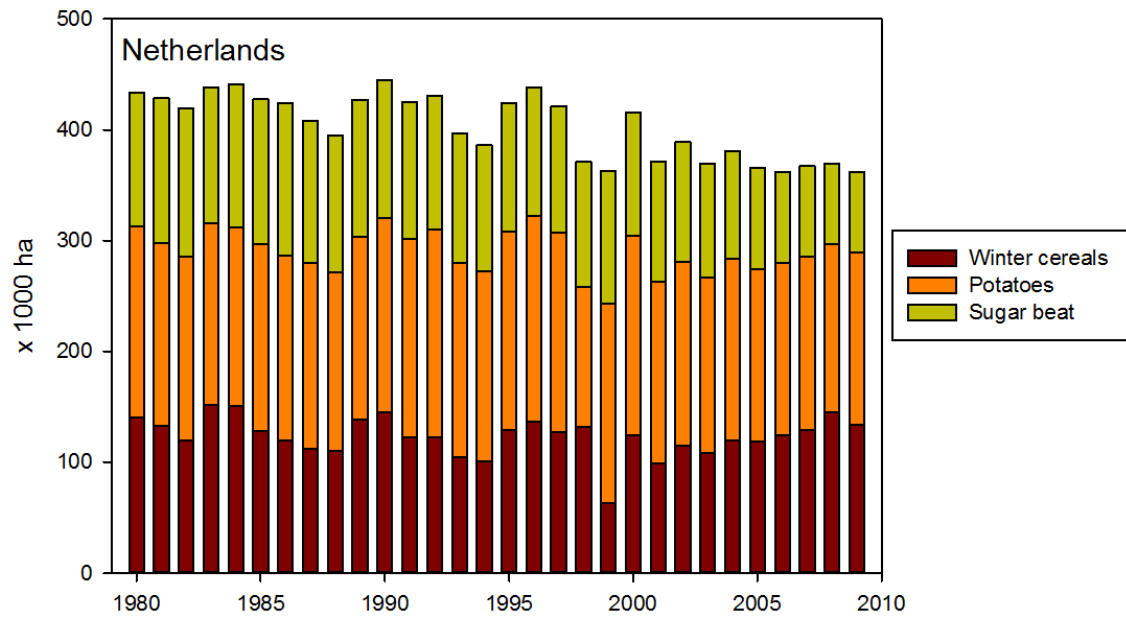

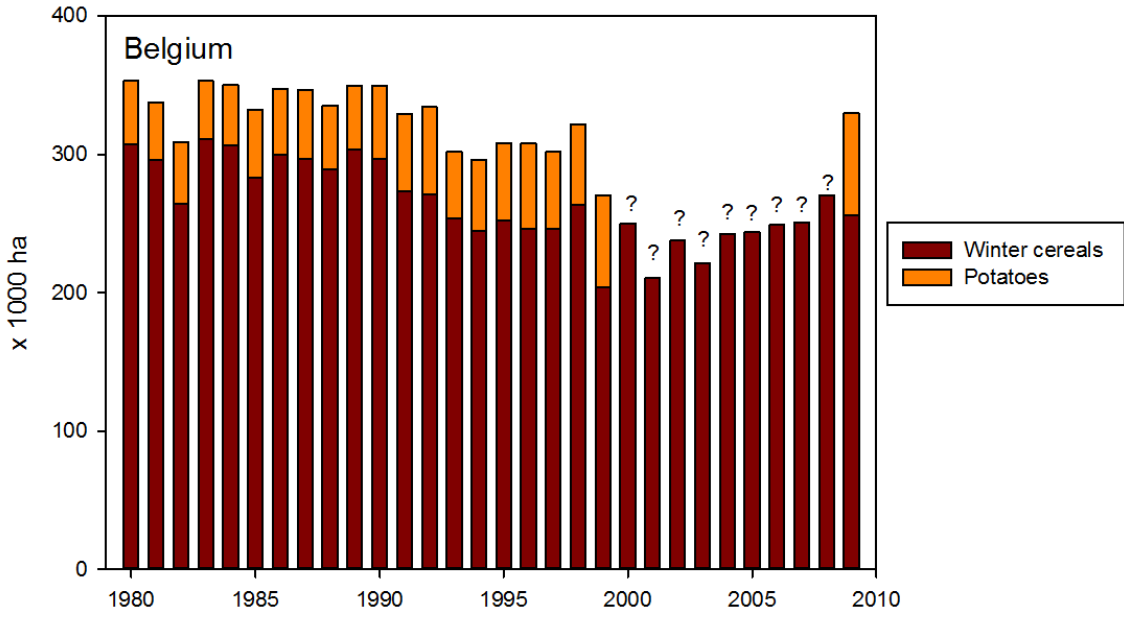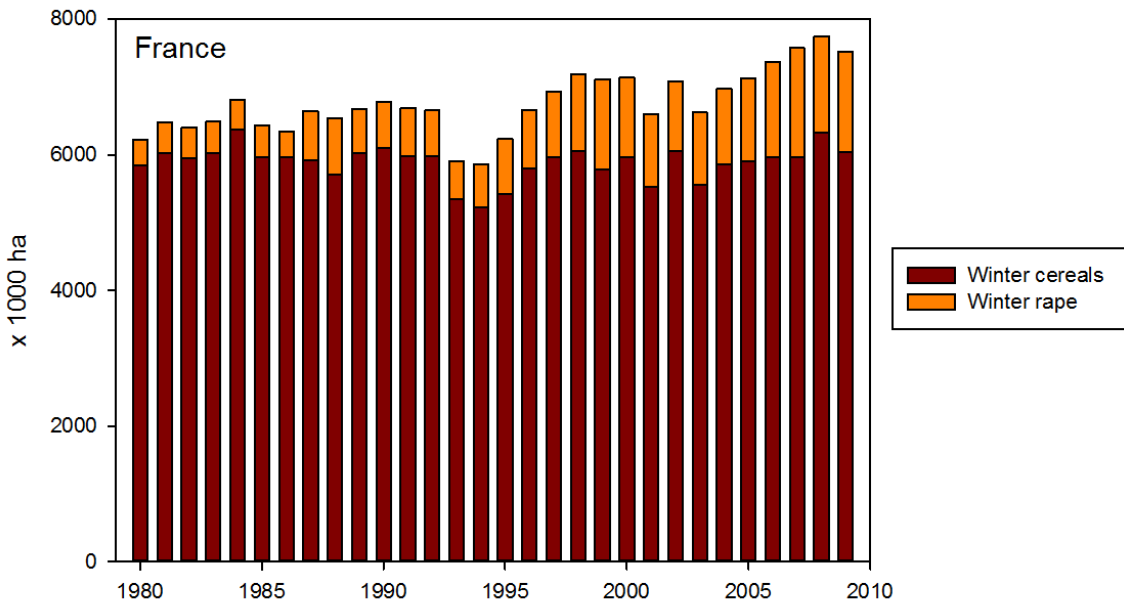

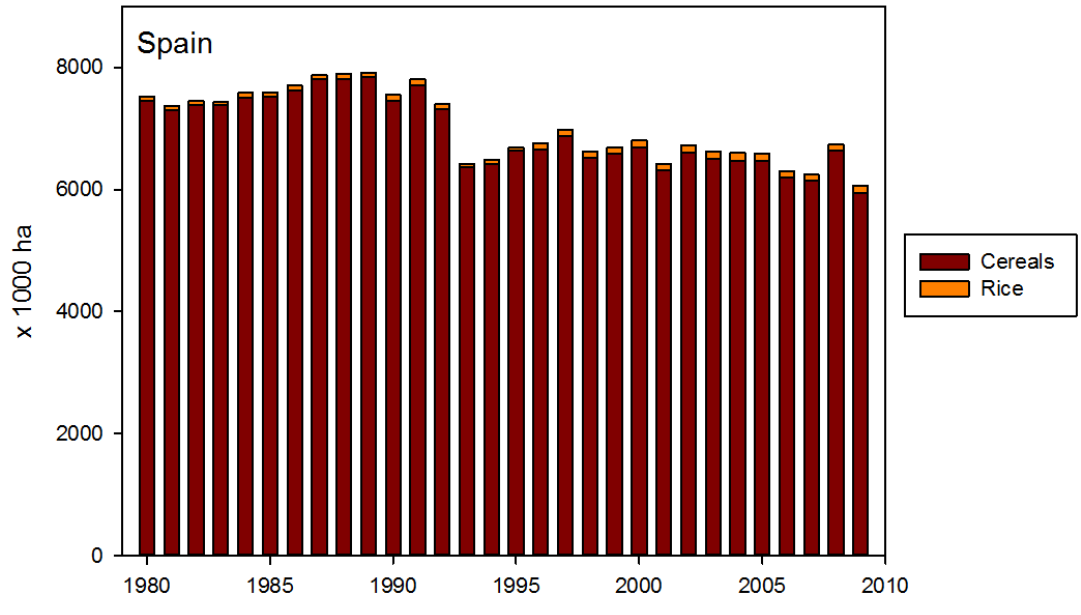

Supplement: pone.0140181.s001.pdf [file pone.0140181.s001.pdf]
