# Supplementary material for: Latitudinal-Related Variation in Wintering Population Trends of Greylag Geese (Anser Anser) along the Atlantic Flyway: A Response to Climate Change?
Source: PubMed Central journal article supplement (PMC4605798; doi:10.1371/journal.pone.0140181), 2015-10-14
Supplement: pone.0140181.s002.pdf [file pone.0140181.s002.pdf]

**S1 Table.** Meteorological stations considered in this study. Data from<http://www.cru.uea.ac.uk/data/>

| <b>Number</b> | <b>Name</b>          | <b>Country</b> | <b>Latitude</b> | <b>Longitude</b> | <b>Height</b> |
|---------------|----------------------|----------------|-----------------|------------------|---------------|
| 25500         | Jonkoping Flygplats  | Sweden         | 57,8            | 14,1             | 226           |
| 25890         | Gotska Sandoen       | Sweden         | 58,4            | 19,2             | 12            |
| 25900         | Visby                | Sweden         | 57,7            | 18,3             | 42            |
| 60510         | Vestervig            | Denmark        | 56,8            | 8,3              | 18            |
| 60880         | Nordby               | Denmark        | 55,4            | 8,4              | 5             |
| 61320         | Tranebjerg           | Denmark        | 55,9            | 10,6             | 11            |
| 61860         | Koebenhavn           | Denmark        | 55,7            | 12,5             | 9             |
| 61930         | Hammerodde-Fyr       | Denmark        | 55,3            | 14,8             | 11            |
| 62400         | Amsterdam (Schipol)  | Netherlands    | 52,3            | 4,8              | -4            |
| 62600         | De Bilt              | Netherlands    | 52,1            | 5,2              | 2             |
| 62750         | Deelen               | Netherlands    | 52,1            | 5,9              | 50            |
| 62800         | Eelde                | Netherlands    | 53,1            | 6,6              | 4             |
| 62830         | Winterswijk/Hupsel   | Netherlands    | 52,1            | 6,7              | 29            |
| 63440         | Rotterdam            | Netherlands    | 52,0            | 4,5              | -5            |
| 63500         | Oudenbocsh/Gilze-Riz | Netherlands    | 51,6            | 4,9              | 11            |
| 63700         | Eindhoven            | Netherlands    | 51,5            | 5,4              | 22            |
| 63750         | Gemert/Volkel        | Netherlands    | 51,7            | 5,7              | 20            |
| 63800         | Maastricht           | Netherlands    | 50,9            | 5,8              | 114           |
| 64470         | Brussels/Uccle/Cbt   | Belgium        | 50,8            | 4,4              | 100           |
| 71100         | Brest/Guipavas       | France         | 48,5            | -4,4             | 98            |
| 71900         | Strasbourg Entzhei   | France         | 48,6            | 7,6              | 150           |
| 72220         | Nantes               | France         | 47,2            | -1,6             | 26            |
| 72550         | Bourges              | France         | 47,1            | 2,4              | 161           |
| 72800         | Dijon-Longvic Airpor | France         | 47,3            | 5,1              | 227           |
| 74340         | Limoges/Bellegarde   | France         | 45,9            | 1,2              | 402           |
| 75100         | Bordeaux/Merignac    | France         | 44,8            | -0,7             | 47            |
| 76300         | Toulouse/Blagnac     | France         | 43,6            | 1,4              | 151           |
| 76500         | Marseille Marignag   | France         | 43,4            | 5,2              | 5             |
| 76900         | Nice Airport         | France         | 43,7            | 7,2              | 4             |
| 77470         | Perpignan            | France         | 42,7            | 2,9              | 42            |

|        |                      |         |      |      |     |
|--------|----------------------|---------|------|------|-----|
| 80010  | La Coruña            | Spain   | 43,4 | -8,4 | 67  |
| 80230  | Santander            | Spain   | 43,5 | -3,8 | 64  |
| 80270  | San Sebastián        | Spain   | 43,3 | -2,0 | 252 |
| 80850  | Pamplona             | Spain   | 42,8 | -1,6 | 452 |
| 80940  | Huesca               | Spain   | 42,1 | -0,3 | 541 |
| 81410  | Valladolid           | Spain   | 41,6 | -4,7 | 691 |
| 81600  | Zaragoza             | Spain   | 41,7 | -1,0 | 245 |
| 81800  | Barcelona            | Spain   | 41,4 | 2,2  | 420 |
| 82210  | Madrid/Barajas       | Spain   | 40,5 | -3,6 | 609 |
| 82800  | Albacete             | Spain   | 39,0 | -1,9 | 699 |
| 82850  | Valencia             | Spain   | 39,5 | -0,4 | 11  |
| 83300  | Badajoz              | Spain   | 38,9 | -6,8 | 185 |
| 83480  | Ciudad Real          | Spain   | 39,0 | -3,9 | 627 |
| 83590  | Alicante             | Spain   | 38,4 | -0,5 | 82  |
| 83830  | Huelva               | Spain   | 37,3 | -6,9 | 19  |
| 83900  | Sevilla              | Spain   | 37,4 | -5,9 | 31  |
| 84200  | Granada              | Spain   | 37,1 | -3,6 | 685 |
| 84300  | Murcia               | Spain   | 38,0 | -1,1 | 57  |
| 84530  | Cadiz-San Fernando   | Spain   | 36,5 | -6,2 | 30  |
| 84820  | Malaga               | Spain   | 36,7 | -4,5 | 7   |
| 84870  | Almería/Aeropuerto   | Spain   | 36,9 | -2,4 | 15  |
| 90916  | Putbus               | Germany | 54,7 | 13,4 | 42  |
| 100150 | Helgoland            | Germany | 54,2 | 7,9  | 4   |
| 100200 | List_Auf_Sylt        | Germany | 55,0 | 8,4  | 26  |
| 100350 | Schleswig            | Germany | 54,5 | 9,6  | 43  |
| 101130 | Norderney            | Germany | 53,7 | 7,2  | 11  |
| 101310 | Cuxhaven             | Germany | 53,9 | 8,7  | 5   |
| 101470 | Hamburg-Fuhlsbuettel | Germany | 53,6 | 10,0 | 16  |
| 101620 | Schwerin             | Germany | 53,6 | 11,4 | 59  |
| 101700 | Warnemunde           | Germany | 54,2 | 12,1 | 4   |
| 101840 | Griefswald/Wieck     | Germany | 54,1 | 13,5 | 1   |
| 102240 | Bremen               | Germany | 53,1 | 8,8  | 4   |
| 102700 | Neuruppin            | Germany | 52,9 | 12,8 | 38  |

|        |                      |         |      |      |     |
|--------|----------------------|---------|------|------|-----|
| 102910 | Angermuende          | Germany | 53,0 | 14,0 | 54  |
| 103380 | Hannover             | Germany | 52,5 | 9,7  | 55  |
| 103610 | Magdeburg            | Germany | 52,1 | 11,6 | 85  |
| 103790 | Potsdam              | Germany | 52,4 | 13,1 | 81  |
| 103820 | Berlin-Tegel_Airport | Germany | 52,6 | 13,3 | 36  |
| 103840 | Berlin               | Germany | 52,5 | 13,4 | 50  |
| 103930 | Lindenberg           | Germany | 52,2 | 14,1 | 98  |
| 104000 | Duesseldorf_Airport  | Germany | 51,3 | 6,8  | 37  |
| 104100 | Essen                | Germany | 51,4 | 7,0  | 152 |
| 104300 | Lippspringe,_Bad     | Germany | 51,8 | 8,8  | 157 |
| 104690 | Leipzig              | Germany | 51,3 | 12,4 | 148 |
| 104880 | Dresden-Klotz        | Germany | 51,1 | 13,8 | 232 |
| 104960 | Cottbus              | Germany | 51,8 | 14,3 | 69  |
| 104990 | Gorlitz              | Germany | 51,2 | 15,0 | 237 |
| 105010 | Aachen               | Germany | 50,8 | 6,1  | 177 |
| 105130 | Koeln-Bonn_Airport   | Germany | 50,9 | 7,2  | 92  |
| 105320 | Giessen/Wettenberg   | Germany | 50,6 | 8,7  | 203 |
| 105480 | Meiningen            | Germany | 50,6 | 10,4 | 450 |
| 105540 | Erfurt/Bindersleben  | Germany | 51,0 | 11,0 | 314 |
| 105670 | Gera-Leumnitz        | Germany | 50,9 | 12,1 | 311 |
| 106090 | Trier-Petrisberg     | Germany | 49,7 | 6,7  | 265 |
| 106370 | Frankfurt/m.         | Germany | 50,1 | 8,6  | 113 |
| 106550 | Wuerzburg            | Germany | 49,8 | 10,0 | 268 |
| 106750 | Bamberg              | Germany | 49,9 | 10,9 | 240 |
| 106850 | Hof                  | Germany | 50,3 | 11,9 | 565 |
| 106880 | Weiden               | Germany | 49,7 | 12,2 | 440 |
| 107080 | Saarbruecken         | Germany | 49,2 | 7,0  | 191 |
| 107290 | Mannheim             | Germany | 49,5 | 8,6  | 96  |
| 107380 | Stuttgart/Echterd    | Germany | 48,7 | 9,2  | 396 |
| 107420 | Oehringen            | Germany | 49,2 | 9,5  | 276 |
| 107630 | Nuernberg_Airport    | Germany | 49,5 | 11,1 | 314 |
| 109290 | Konstanz             | Germany | 47,7 | 9,2  | 443 |
