# Supplementary material for: Latitudinal-Related Variation in Wintering Population Trends of Greylag Geese (Anser Anser) along the Atlantic Flyway: A Response to Climate Change?
Source: PubMed Central journal article supplement (PMC4605798; doi:10.1371/journal.pone.0140181), 2015-10-14
Supplement: pone.0140181.s003.pdf [file pone.0140181.s003.pdf]

**S2 Table.** Models

| <b>Country</b>  | <b>Model</b>                    | <b>AICc</b> | <b>ΔAICc</b> | <b>Weight</b> |
|-----------------|---------------------------------|-------------|--------------|---------------|
| Sweden          | year + temperature              | 48.2        | 0.00         | 0.572         |
|                 | year + temperature + sugar beat | 48.8        | 0.58         | 0.428         |
| Denmark         | year+ temperature + cereals     | 42.6        | 0.00         | 0.499         |
| Germany         | year + temperature + rape       | 5.38        | 0.00         | 0.59          |
|                 | year + temperature              | 6.10        | 0.72         | 0.41          |
| The Netherlands | year                            | 3.4         | 0.00         | 0.266         |
|                 | year + cereals                  | 3.7         | 0.32         | 0.227         |
|                 | year + potatoes                 | 4.1         | 0.66         | 0.191         |
|                 | year + temperature              | 4.3         | 0.83         | 0.176         |
|                 | year + temperature + cereals    | 4.7         | 1.29         | 0.140         |
| Belgium         | year                            | 28.2        | 0.00         | 0.687         |
| France          | year + cereals                  | 64.2        | 0.00         | 0.52          |
|                 | year                            | 64.4        | 0.16         | 0.48          |
| Spain           | year + temperature              | -19.7       | 0.00         | 0.52          |
|                 | Year + temperature + rice       | -19.6       | 0.16         | 0.48          |
