# Supplementary material for: Latitudinal-Related Variation in Wintering Population Trends of Greylag Geese (Anser Anser) along the Atlantic Flyway: A Response to Climate Change?
Source: PubMed Central journal article supplement (PMC4605798; doi:10.1371/journal.pone.0140181), 2015-10-14
Supplement: pone.0140181.s004.pdf [file pone.0140181.s004.pdf]

**S3 Table.** Changes reported in the timing of greylag geese migration in the Atlantic flyway.

| <b>Locality</b>                 | <b>Migration</b> | <b>Change in dates</b>                    | <b>Period</b> | <b>Source</b> |
|---------------------------------|------------------|-------------------------------------------|---------------|---------------|
| Western France<br>(Passage)     | Spring           | From early<br>February to mid-<br>January | 1980-2005     | [14]          |
| Vega (Norway)<br>(Breeding)     | Spring           | 5-7 days earlier<br>per decade            | 1971-2004     | [13]          |
| Scania (Sweden)<br>(Breeding)   | Spring           | 20 days earlier                           | 1986-2002     | [12]          |
| Netherlands                     | Autumn           | 40 days later (from<br>Scania)            | 1986-2002     | [12]          |
| Guadalquivir<br>marshes (Spain) | Autumn           | 4 days later per<br>decade                | 1961-2012     | This paper    |
